# Supplementary material for: Di-ruthenium complexes of 1,4-diazabutadiene ligands: synthesis, characterization and utilization as catalyst precursors for the oxidative coupling of amines to imines in air
Source: Royal Society of Chemistry journal article supplement (doi:10.1039/d3nj01030a), 2023-01-01
Supplement: d3nj01030a1.pdf [file d3nj01030a1.pdf]

## Electronic supplementary information (ESI)

### **Di-ruthenium complexes of 1,4-diazabutadiene ligands: Synthesis, characterization and utilization as catalyst-precursor for oxidative coupling of amine to imine in air**

Rumpa Saha, Aparajita Mukherjee and Samaresh Bhattacharya\*

*Department of Chemistry, Inorganic Chemistry Section, Jadavpur University,  
Kolkata - 700 032, India.*

*E-mail: samareshb.chemistry@jadavpuruniversity.in*

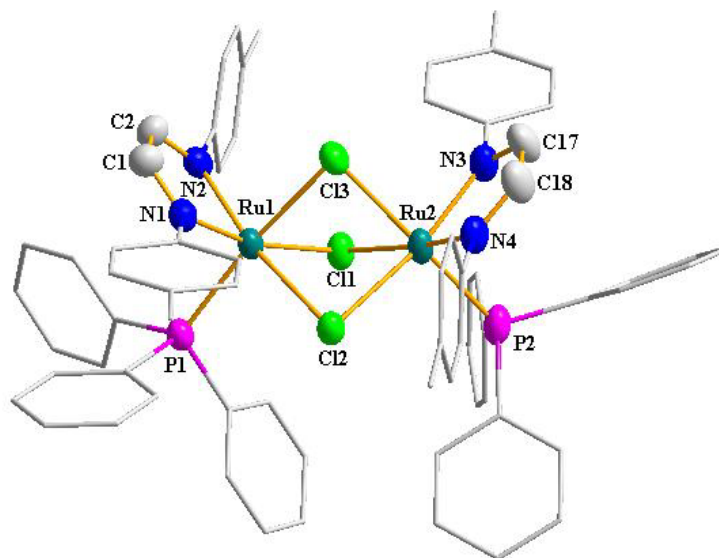

**Fig. S1** Crystal structure of the complex cation in **2**.

**Table S1** Selected bond distances and bond angles for complex **2**

| Bond distances (Å) |           |               |           |
|--------------------|-----------|---------------|-----------|
| Ru1-N1             | 2.056(2)  | Ru2-N3        | 2.029(3)  |
| Ru1-N2             | 2.021(2)  | Ru2-N4        | 2.012(3)  |
| Ru1- P1            | 2.3011(9) | Ru2-P2        | 2.3140(9) |
| Ru1- Cl1           | 2.4151(7) | Ru2-Cl1       | 2.4221(8) |
| Ru1- Cl2           | 2.4773(8) | Ru2-Cl2       | 2.4756(8) |
| Ru1- Cl3           | 2.4456(7) | Ru2-Cl3       | 2.4585(8) |
| N1-C1              | 1.290(4)  | N3-C17        | 1.303(5)  |
| N1-C3              | 1.435(4)  | N3-C19        | 1.439(4)  |
| C1-C2              | 1.408(4)  | C17-C18       | 1.409(5)  |
| N2-C2              | 1.300(4)  | N4-C18        | 1.300(4)  |
| N2-C10             | 1.438(4)  | N4-C26        | 1.437(4)  |
| Bond angles (°)    |           |               |           |
| N1-Ru1-N2          | 78.11(10) | Ru1- Cl1- Ru2 | 84.12(2)  |
| N3-Ru2-N4          | 77.82(11) | Ru1- Cl2- Ru2 | 81.73(3)  |
| Ru1- Cl3- Ru2      | 82.72(2)  |               |           |

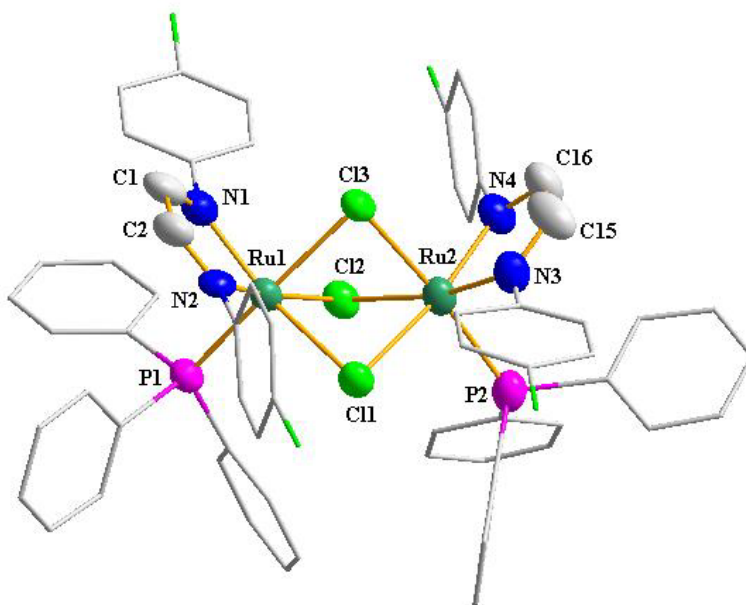

**Fig. S2** Crystal structure of the complex cation in **4**.

**Table S2** Selected bond distances and bond angles for complex **4**

| Bond distances (Å) |           |             |           |
|--------------------|-----------|-------------|-----------|
| Ru1-N1             | 2.041(9)  | Ru2-N3      | 2.021(9)  |
| Ru1-N2             | 2.034(9)  | Ru2-N4      | 2.045(9)  |
| Ru1-P1             | 2.312(3)  | Ru2-P2      | 2.325(4)  |
| Ru1-Cl1            | 2.413(3)  | Ru2-Cl1     | 2.429(3)  |
| Ru1-Cl2            | 2.448(3)  | Ru2-Cl2     | 2.461(3)  |
| Ru1-Cl3            | 2.481(2)  | Ru2-Cl3     | 2.492(3)  |
| N1-C1              | 1.302(15) | N3-C15      | 1.312(15) |
| N1-C3              | 1.445(13) | N3-C17      | 1.449(13) |
| C1-C2              | 1.402(14) | C15-C16     | 1.398(17) |
| N2-C2              | 1.296(14) | N4-C16      | 1.288(14) |
| N2-C9              | 1.444(12) | N4-C23      | 1.437(13) |
| Bond angles (°)    |           |             |           |
| N1-Ru1-N2          | 77.7(4)   | Ru1-Cl1-Ru2 | 84.18(8)  |
| N3-Ru2-N4          | 77.7(4)   | Ru1-Cl2-Ru2 | 82.78(8)  |
| Ru1-Cl3-Ru2        | 81.49(8)  |             |           |

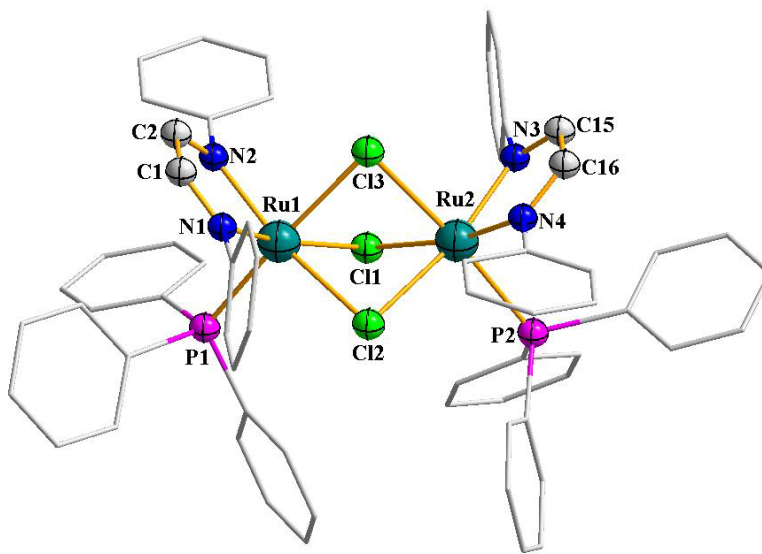

**Fig. S3** DFT-optimized structure of complex cation in **3**.

**Table S3** Some computed bond distances and bond angles for the complex cation in **3**

| Bond distances (Å) |        |             |        |
|--------------------|--------|-------------|--------|
| Ru1-N1             | 2.0578 | Ru2-N3      | 2.0639 |
| Ru1-N2             | 2.0875 | Ru2-N4      | 2.0747 |
| Ru1-P1             | 2.4079 | Ru2-P2      | 2.4034 |
| Ru1-Cl1            | 2.5211 | Ru2-Cl1     | 2.5285 |
| Ru1-Cl2            | 2.5137 | Ru2-Cl2     | 2.5145 |
| Ru1-Cl3            | 2.5576 | Ru2-Cl3     | 2.5526 |
| N1-C1              | 1.3106 | N3-C15      | 1.3109 |
| N1-C3              | 1.4280 | N3-C17      | 1.4269 |
| C1-C2              | 1.4269 | C15-C16     | 1.4273 |
| N2-C2              | 1.3116 | N4-C16      | 1.3091 |
| N2-C9              | 1.4286 | N4-C23      | 1.4292 |
| Bond angles (°)    |        |             |        |
| N1-Ru1-N2          | 78.25  | Ru1-Cl1-Ru2 | 83.97  |
| N3-Ru2-N4          | 78.22  | Ru1-Cl2-Ru2 | 84.41  |
| Ru1-Cl3-Ru2        | 82.75  |             |        |

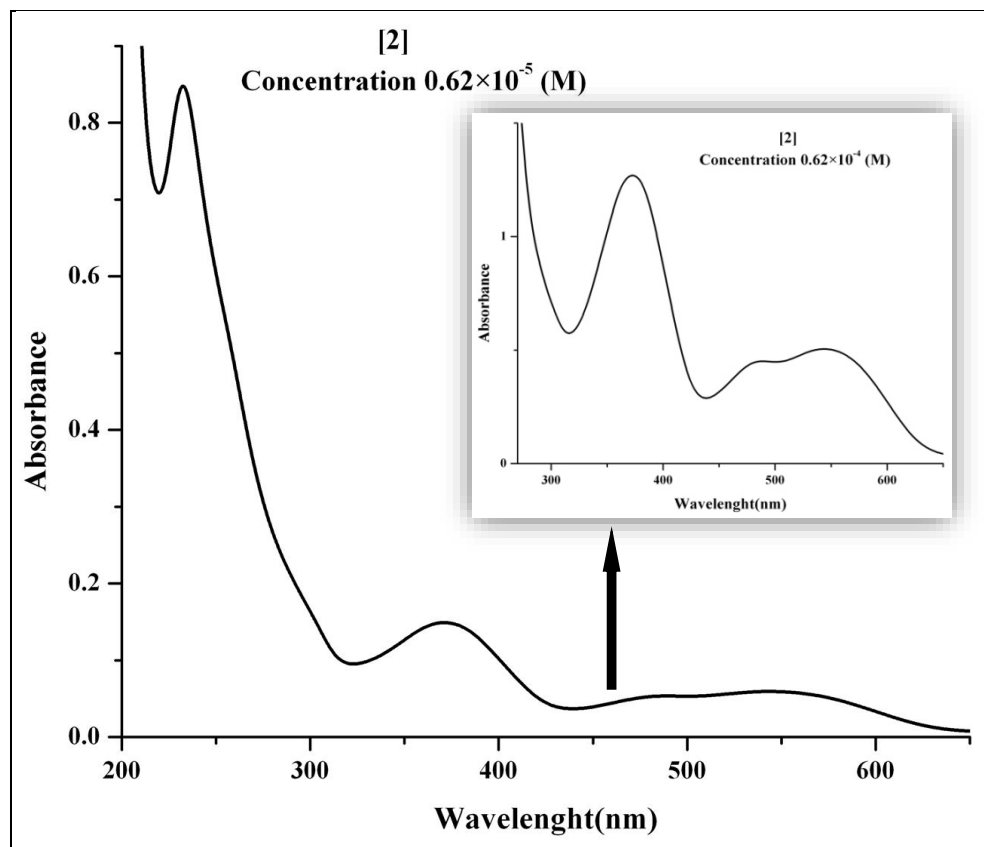

Fig. S4 Electronic absorption spectrum of complex 2 in dichloromethane solution.

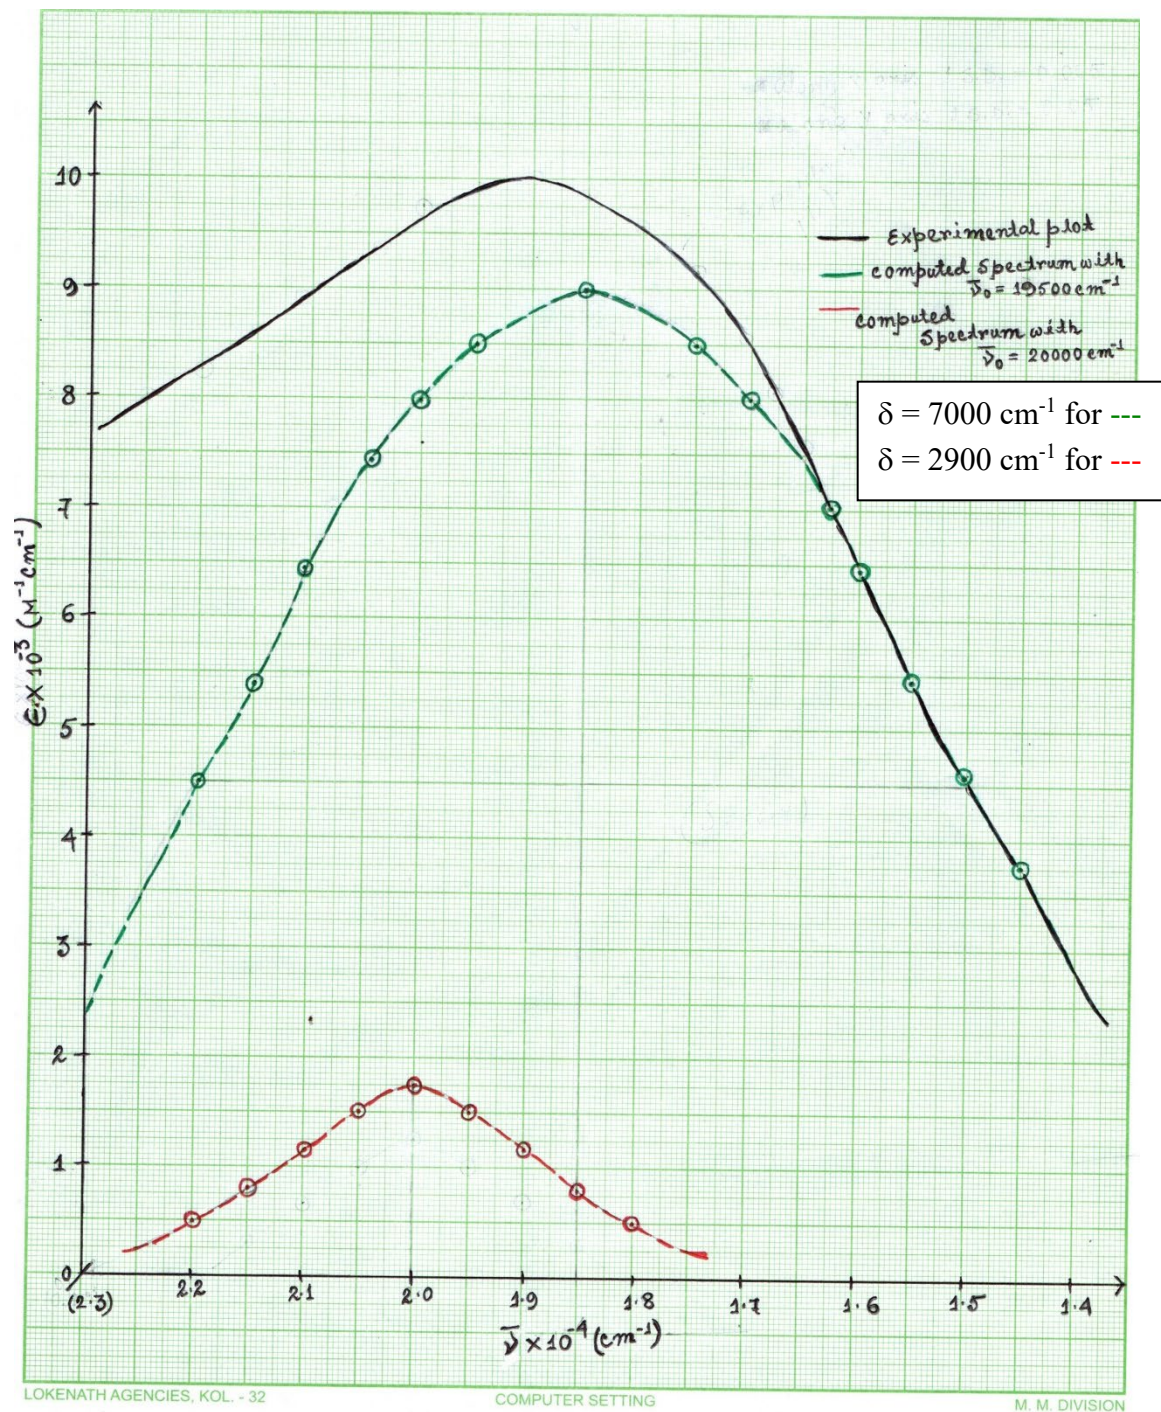

Fig. S5 Electronic absorption spectrum of complex 3 (—) and its Gaussian components (--- and ---).

**Table S4** Computed parameters from TDDFT calculations on complex **1** for electronic spectral properties in dichloromethane solution

| Excited State | Composition            | CI value | $E$ (eV) | Oscillator strength ( $f$ ) | $\lambda_{\text{theo}}$ (nm) | Assignment     | $\lambda_{\text{exp}}$ (nm) |
|---------------|------------------------|----------|----------|-----------------------------|------------------------------|----------------|-----------------------------|
| 1             | H-5 $\rightarrow$ L+1  | 0.11000  | 2.3242   | 0.0564                      | 533.44                       | MLCT/ILCT      | 548                         |
|               | H-3 $\rightarrow$ L    | 0.39293  |          |                             |                              | MLCT/ILCT      |                             |
|               | H-3 $\rightarrow$ L+1  | 0.12345  |          |                             |                              | MLCT/ILCT      |                             |
|               | H-2 $\rightarrow$ L+1  | 0.49334  |          |                             |                              | MLCT/ILCT      |                             |
|               | H $\rightarrow$ L      | 0.19366  |          |                             |                              | MLCT/ILCT      |                             |
| 2             | H-6 $\rightarrow$ L+1  | 0.13693  | 2.5768   | 0.4669                      | 481.15                       | ILCT/MLCT      | 493                         |
|               | H-4 $\rightarrow$ L    | 0.61592  |          |                             |                              | ILCT/MLCT      |                             |
|               | H-4 $\rightarrow$ L+1  | 0.11538  |          |                             |                              | MLCT/ILCT      |                             |
|               | H-2 $\rightarrow$ L+1  | 0.14221  |          |                             |                              | MLCT/ILCT      |                             |
|               | H $\rightarrow$ L      | 0.13757  |          |                             |                              | MLCT/ILCT      |                             |
| 3             | H-9 $\rightarrow$ L    | 0.47180  | 3.1265   | 0.0127                      | 396.55                       | MLCT/ILCT      | 406                         |
|               | H-9 $\rightarrow$ L+1  | 0.23324  |          |                             |                              | MLCT/ILCT      |                             |
|               | H-2 $\rightarrow$ L+2  | 0.17700  |          |                             |                              | LLCT           |                             |
|               | H-1 $\rightarrow$ L+4  | 0.15092  |          |                             |                              | LLCT           |                             |
|               | H $\rightarrow$ L+5    | 0.26872  |          |                             |                              | LMCT           |                             |
| 4             | H-31 $\rightarrow$ L   | 0.14232  | 5.377    | 0.0750                      | 230.58                       | ILCT/LLCT/MLCT | 232                         |
|               | H-26 $\rightarrow$ L+1 | 0.17726  |          |                             |                              | ILCT/LMCT      |                             |
|               | H-25 $\rightarrow$ L   | 0.10217  |          |                             |                              | ILCT/LLCT      |                             |
|               | H-25 $\rightarrow$ L+1 | 0.41700  |          |                             |                              | ILCT/LLCT      |                             |
|               | H-24 $\rightarrow$ L   | 0.27590  |          |                             |                              | ILCT/LLCT/LMCT |                             |
|               | H-14 $\rightarrow$ L+2 | 0.12650  |          |                             |                              | LMCT/ILCT/LLCT |                             |
|               | H-4 $\rightarrow$ L+11 | 0.10550  |          |                             |                              | ILCT/MLCT      |                             |
|               | H-1 $\rightarrow$ L+12 | 0.10760  |          |                             |                              | ILCT/MLCT/LLCT |                             |
|               | H $\rightarrow$ L+12   | 0.12803  |          |                             |                              | MLCT/ILCT/LLCT |                             |
|               | H $\rightarrow$ L+13   | 0.16245  |          |                             |                              | MLCT/ILCT/LLCT |                             |

**Table S5** Compositions of the molecular orbitals of complex **1** associated with the electronic spectral transitions

| % Contribution<br>of fragments to | Fragments |                  |                    |    |
|-----------------------------------|-----------|------------------|--------------------|----|
|                                   | Ru        | PMe <sub>3</sub> | L-OCH <sub>3</sub> | Cl |
| HOMO (H)                          | 53        | 3                | 33                 | 11 |
| H-1                               | 52        | 1                | 37                 | 10 |
| H-2                               | 54        | 2                | 33                 | 11 |
| H-3                               | 67        | 1                | 24                 | 8  |
| H-4                               | 35        | 2                | 58                 | 5  |
| H-5                               | 46        | 3                | 47                 | 4  |
| H-6                               | 36        | 2                | 58                 | 4  |
| H-9                               | 36        | 3                | 53                 | 8  |
| H-14                              | 5         | 6                | 33                 | 56 |
| H-24                              | 5         | 1                | 84                 | 10 |
| H-25                              | 16        | 11               | 42                 | 31 |
| H-26                              | 2         | 1                | 92                 | 5  |
| H-31                              | 20        | 21               | 43                 | 16 |
| LUMO (L)                          | 14        | 1                | 83                 | 2  |
| L+1                               | 14        | 1                | 83                 | 2  |
| L+2                               | 58        | 7                | 24                 | 11 |
| L+4                               | 52        | 22               | 16                 | 10 |
| L+5                               | 62        | 2                | 26                 | 10 |
| L+11                              | 4         | 2                | 93                 | 1  |
| L+12                              | 6         | 32               | 62                 | 0  |
| L+13                              | 13        | 2                | 85                 | 0  |



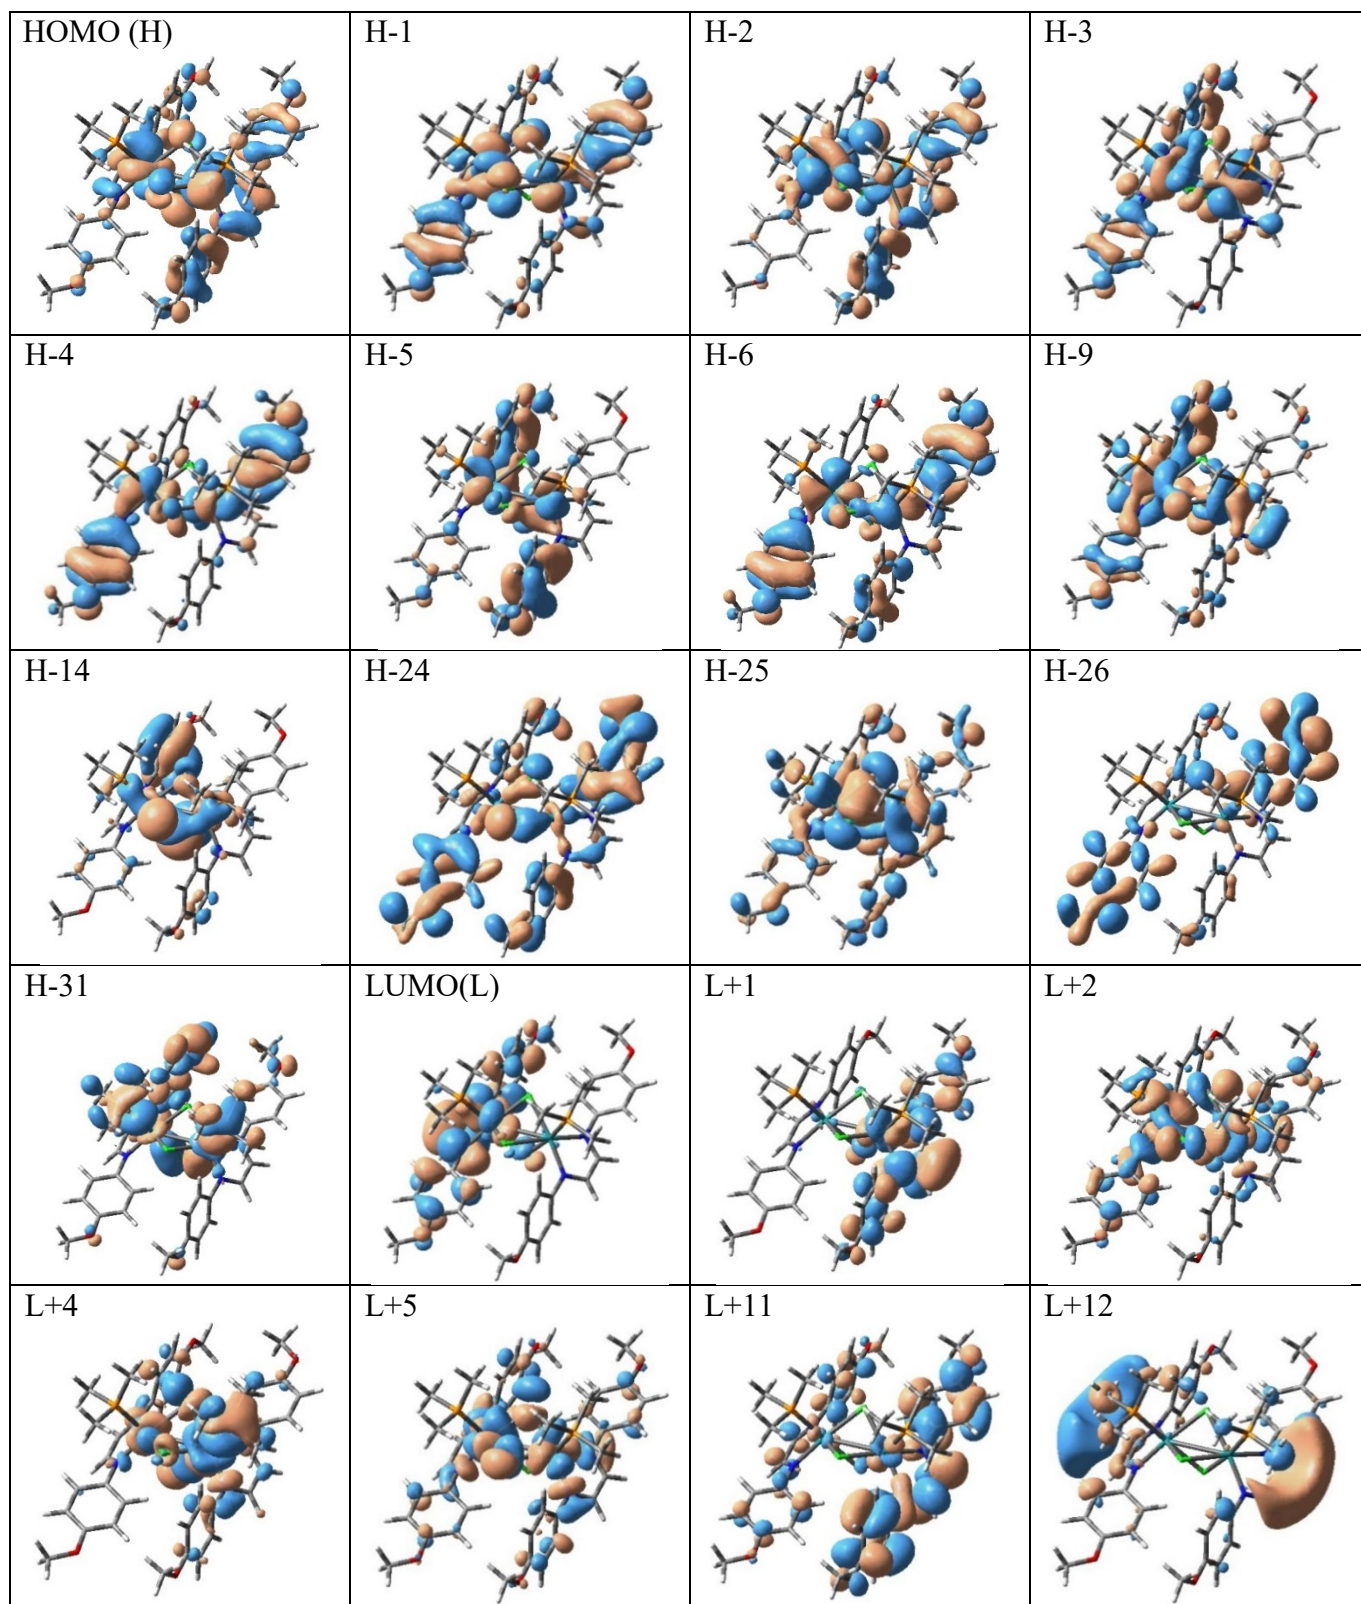

**Fig. S6** Contour plots of the molecular orbitals of complex **1**, which are associated with the electronic spectral transitions (See **Table S4**).

**Table S6** Computed parameters from TDDFT calculations on complex **2** for electronic spectral properties in dichloromethane solution

| Excited State | Composition            | CI value | $E$ (eV) | Oscillator strength ( $f$ ) | $\lambda_{\text{theo}}$ (nm) | Assignment     | $\lambda_{\text{exp}}$ (nm) |
|---------------|------------------------|----------|----------|-----------------------------|------------------------------|----------------|-----------------------------|
| 1             | H-3 $\rightarrow$ L+1  | 0.18735  | 2.2621   | 0.0612                      | 548.09                       | MLCT/ILCT      | 544                         |
|               | H-2 $\rightarrow$ L    | 0.47769  |          |                             |                              | MLCT/ILCT      |                             |
|               | H-1 $\rightarrow$ L+1  | 0.42587  |          |                             |                              | MLCT/LLCT      |                             |
|               | H $\rightarrow$ L      | 0.20560  |          |                             |                              | MLCT/ILCT/LLCT |                             |
| 2             | H-4 $\rightarrow$ L    | 0.66239  | 2.6934   | 0.0536                      | 460.33                       | MLCT/ILCT      | 486                         |
|               | H-1 $\rightarrow$ L+1  | 0.15025  |          |                             |                              | MLCT/LLCT      |                             |
| 3             | H-9 $\rightarrow$ L    | 0.50844  | 3.2731   | 0.0185                      | 378.78                       | ILCT/LMCT      | 373                         |
|               | H-8 $\rightarrow$ L+1  | 0.39464  |          |                             |                              | ILCT/LLCT/LMCT |                             |
|               | H-2 $\rightarrow$ L+4  | 0.11230  |          |                             |                              | MLCT/ILCT      |                             |
|               | H-1 $\rightarrow$ L+3  | 0.15904  |          |                             |                              | MLCT/LLCT      |                             |
| 4             | H-15 $\rightarrow$ L+2 | 0.13853  | 5.1850   | 0.1283                      | 239.12                       | LMCT/LLCT/ILCT | 232                         |
|               | H-12 $\rightarrow$ L+2 | 0.12656  |          |                             |                              | LMCT/LLCT      |                             |
|               | H-10 $\rightarrow$ L+2 | 0.41806  |          |                             |                              | LMCT/LLCT      |                             |
|               | H-9 $\rightarrow$ L+4  | 0.22004  |          |                             |                              | LMCT/LLCT      |                             |
|               | H-8 $\rightarrow$ L+3  | 0.29231  |          |                             |                              | LMCT/LLCT      |                             |
|               | H-8 $\rightarrow$ L+5  | 0.13579  |          |                             |                              | LMCT/LLCT      |                             |
|               | H-3 $\rightarrow$ L+9  | 0.25740  |          |                             |                              | MLCT/ILCT      |                             |

**Table S7** Compositions of the molecular orbitals of complex **2** associated with the electronic spectral transitions

| % Contribution<br>of fragments to | Fragments |                  |                   |    |
|-----------------------------------|-----------|------------------|-------------------|----|
|                                   | Ru        | PMe <sub>3</sub> | L-CH <sub>3</sub> | Cl |
| HOMO (H)                          | 66        | 4                | 15                | 15 |
| H-1                               | 72        | 0                | 8                 | 20 |
| H-2                               | 78        | 0                | 13                | 9  |
| H-3                               | 66        | 3                | 29                | 2  |
| H-4                               | 56        | 3                | 38                | 3  |
| H-8                               | 2         | 0                | 76                | 22 |
| H-9                               | 4         | 1                | 91                | 4  |
| H-10                              | 0         | 0                | 86                | 14 |
| H-12                              | 1         | 0                | 89                | 10 |
| H-15                              | 6         | 24               | 4                 | 66 |
| LUMO (L)                          | 14        | 1                | 82                | 3  |
| L+1                               | 16        | 0                | 84                | 0  |
| L+2                               | 56        | 6                | 26                | 12 |
| L+3                               | 47        | 27               | 13                | 13 |
| L+4                               | 53        | 18               | 19                | 10 |
| L+5                               | 59        | 2                | 29                | 10 |
| L+9                               | 4         | 2                | 93                | 1  |

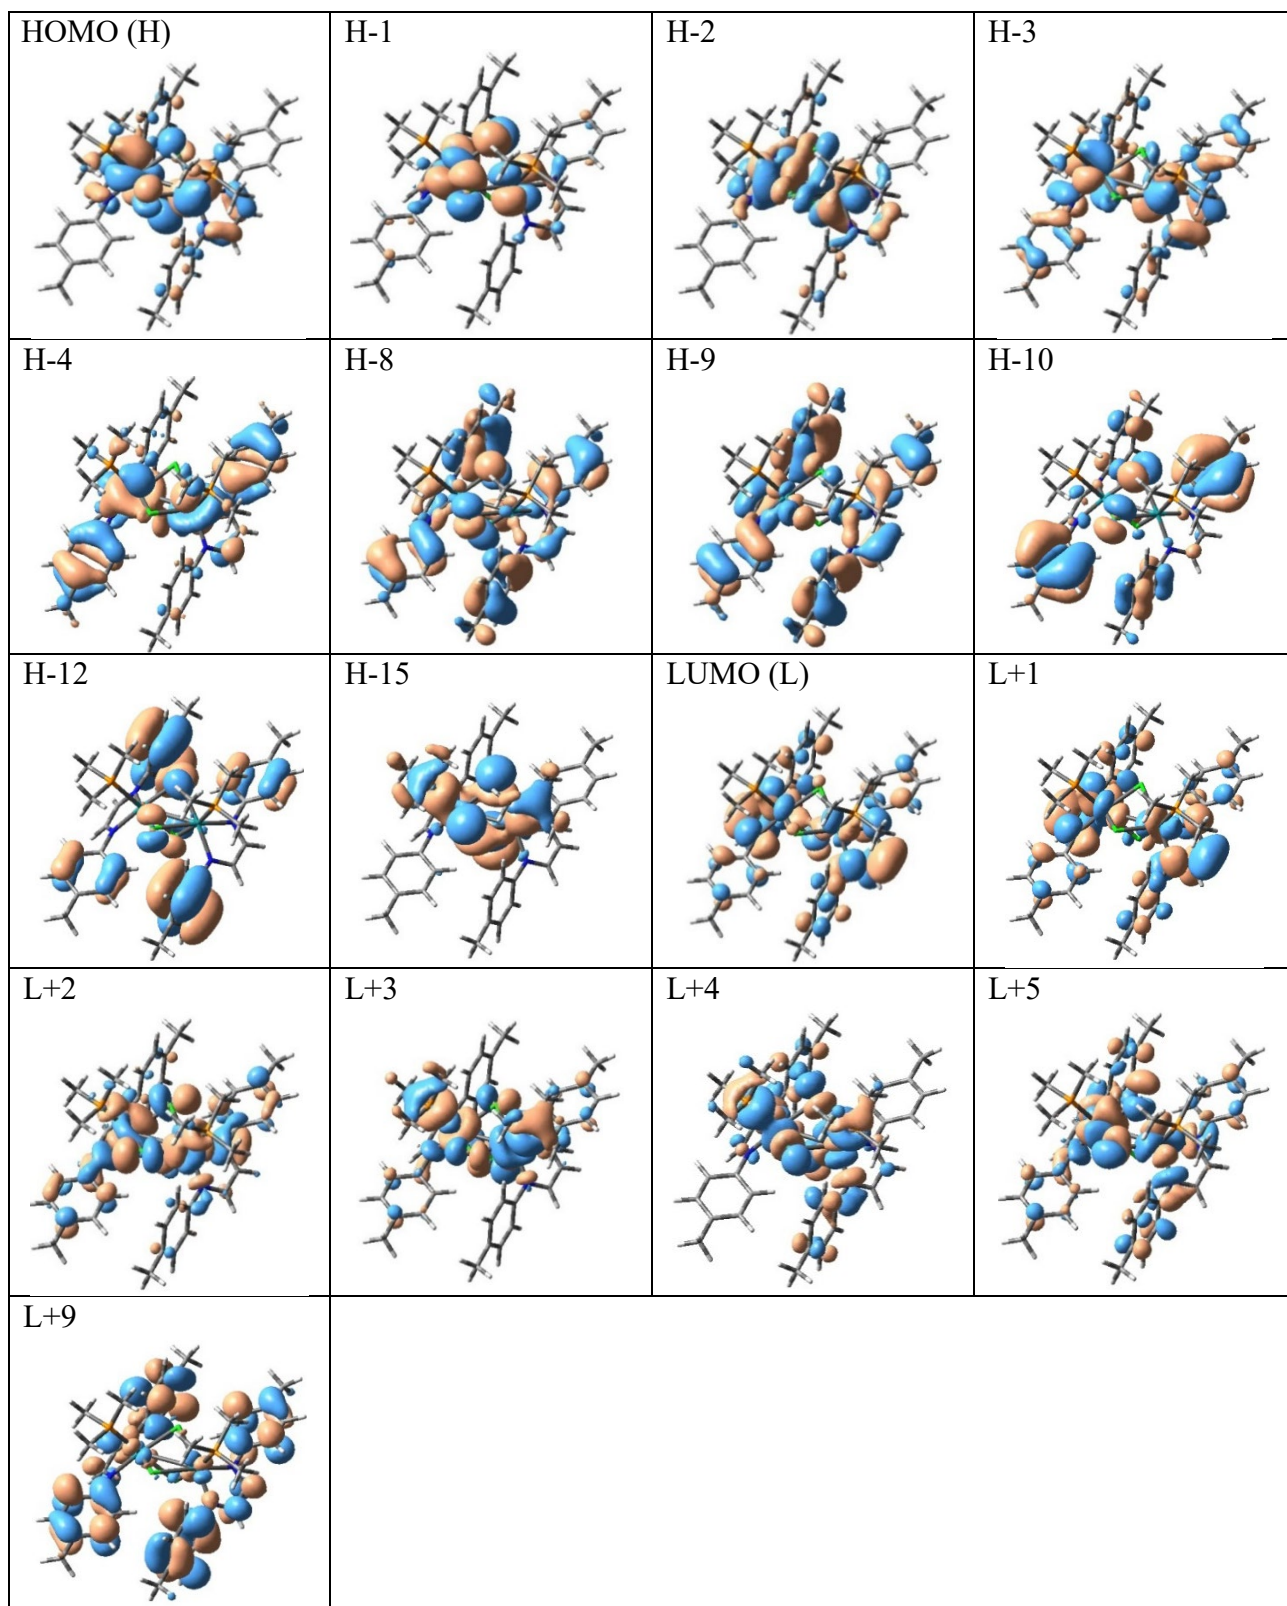

**Fig. S7** Contour plots of the molecular orbitals of complex **2**, which are associated with the electronic spectral transitions (See **Table S6**).

**Table S8** Computed parameters from TDDFT calculations on complex **3** for electronic spectral properties in dichloromethane solution

| Excited State | Composition            | CI value | $E$ (eV) | Oscillator strength ( $f$ ) | $\lambda_{\text{theo}}$ (nm) | Assignment     | $\lambda_{\text{exp}}$ (nm) |
|---------------|------------------------|----------|----------|-----------------------------|------------------------------|----------------|-----------------------------|
| 1             | H-3 $\rightarrow$ L+1  | 0.56856  | 2.3302   | 0.0153                      | 532.07                       | MLCT/ILCT      | 523                         |
|               | H-2 $\rightarrow$ L    | 0.25391  |          |                             |                              | MLCT/ILCT      |                             |
|               | H-1 $\rightarrow$ L+1  | 0.10614  |          |                             |                              | MLCT/LLCT      |                             |
|               | H $\rightarrow$ L      | 0.30764  |          |                             |                              | MLCT/ILCT/LLCT |                             |
| 2             | H-7 $\rightarrow$ L    | 0.33846  | 3.3654   | 0.0202                      | 368.41                       | ILCT/MLCT      | 358                         |
|               | H-6 $\rightarrow$ L+1  | 0.25469  |          |                             |                              | ILCT           |                             |
|               | H-4 $\rightarrow$ L+3  | 0.11357  |          |                             |                              | MLCT/LLCT      |                             |
|               | H-2 $\rightarrow$ L+2  | 0.13737  |          |                             |                              | MLCT/ILCT      |                             |
|               | H-2 $\rightarrow$ L+3  | 0.25381  |          |                             |                              | MLCT           |                             |
|               | H-1 $\rightarrow$ L+4  | 0.39272  |          |                             |                              | MLCT/LLCT      |                             |
|               | H $\rightarrow$ L+2    | 0.10146  |          |                             |                              | MLCT           |                             |
| 3             | H-17 $\rightarrow$ L+3 | 0.12378  | 5.5602   | 0.0706                      | 222.98                       | LMCT           | 223                         |
|               | H-14 $\rightarrow$ L+4 | 0.13964  |          |                             |                              | LMCT/LLCT      |                             |
|               | H-6 $\rightarrow$ L+4  | 0.15586  |          |                             |                              | LMCT/LLCT      |                             |
|               | H-5 $\rightarrow$ L+7  | 0.11469  |          |                             |                              | MLCT/LLCT/ILCT |                             |
|               | H-5 $\rightarrow$ L+8  | 0.50238  |          |                             |                              | MLCT/LLCT/ILCT |                             |
|               | H-5 $\rightarrow$ L+9  | 0.16654  |          |                             |                              | MLCT/LLCT/ILCT |                             |
|               | H-4 $\rightarrow$ L+6  | 0.10066  |          |                             |                              | MLCT/ILCT      |                             |
|               | H-4 $\rightarrow$ L+11 | 0.21133  |          |                             |                              | MLCT/ILCT      |                             |

**Table S9** Compositions of the molecular orbitals of complex **3** associated with the electronic spectral transitions

| % Contribution<br>of fragments to | Fragments |                  |     |    |
|-----------------------------------|-----------|------------------|-----|----|
|                                   | Ru        | PMe <sub>3</sub> | L-H | Cl |
| HOMO (H)                          | 68        | 4                | 12  | 16 |
| H-1                               | 73        | 0                | 7   | 20 |
| H-2                               | 79        | 1                | 12  | 8  |
| H-3                               | 73        | 4                | 22  | 1  |
| H-4                               | 70        | 4                | 23  | 3  |
| H-5                               | 63        | 4                | 20  | 13 |
| H-6                               | 15        | 3                | 80  | 2  |
| H-7                               | 18        | 0                | 78  | 4  |
| H-14                              | 10        | 20               | 5   | 65 |
| H-17                              | 11        | 32               | 12  | 45 |
| LUMO (L)                          | 14        | 1                | 82  | 3  |
| L+1                               | 17        | 0                | 82  | 1  |
| L+2                               | 56        | 4                | 28  | 12 |
| L+3                               | 48        | 27               | 12  | 13 |
| L+4                               | 53        | 19               | 18  | 10 |
| L+6                               | 2         | 0                | 98  | 0  |
| L+7                               | 2         | 0                | 98  | 0  |
| L+8                               | 4         | 2                | 93  | 1  |
| L+9                               | 6         | 3                | 90  | 1  |
| L+11                              | 3         | 0                | 97  | 0  |



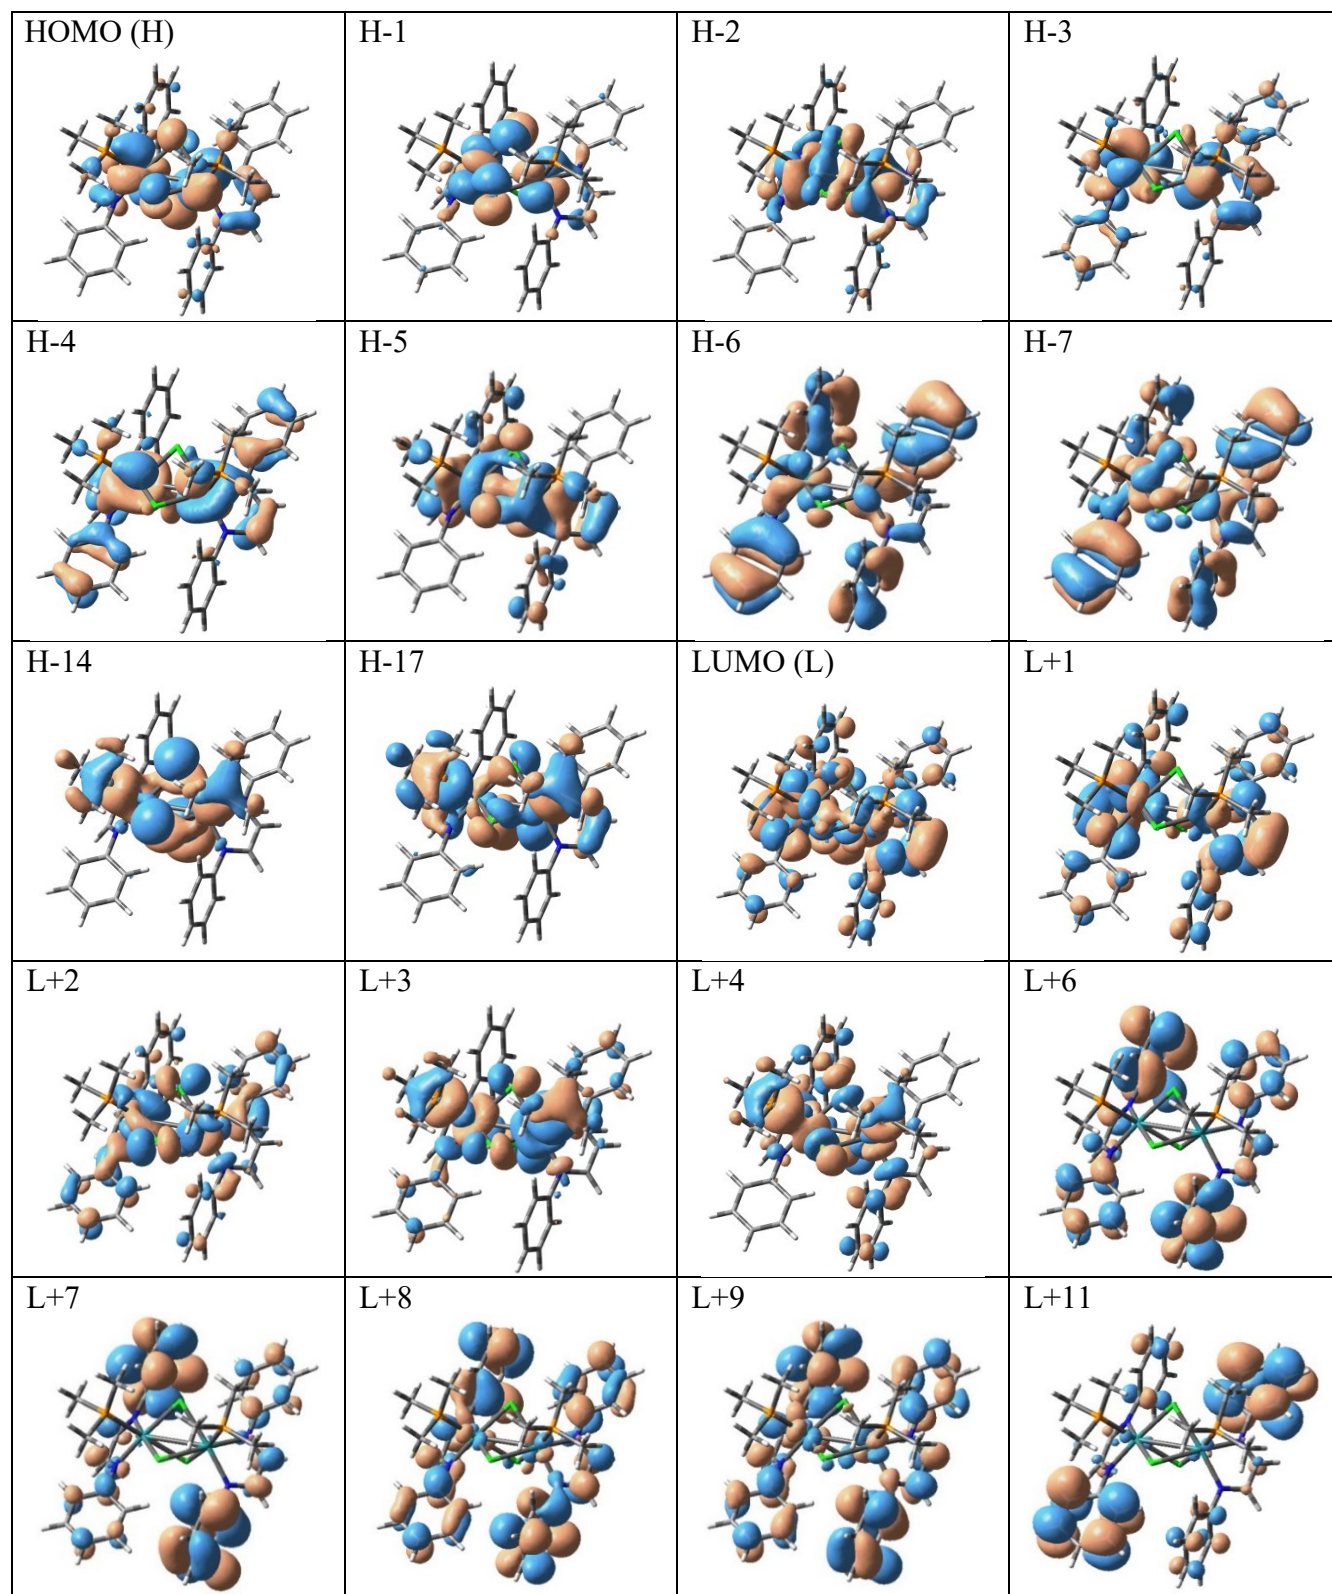

**Fig. S8** Contour plots of the molecular orbitals of complex **3**, which are associated with the electronic spectral transitions (See **Table S8**).

**Table S10** Computed parameters from TDDFT calculations on complex **4** for electronic spectral properties in dichloromethane solution

| Excited State | Composition            | CI value | $E$ (eV) | Oscillator strength ( $f$ ) | $\lambda_{\text{theo}}$ (nm) | Assignment     | $\lambda_{\text{exp}}$ (nm) |
|---------------|------------------------|----------|----------|-----------------------------|------------------------------|----------------|-----------------------------|
| 1             | H-3 $\rightarrow$ L+1  | 0.20748  | 2.2288   | 0.0591                      | 556.29                       | MLCT/ILCT      | 548                         |
|               | H-2 $\rightarrow$ L    | 0.47636  |          |                             |                              | MLCT/ILCT      |                             |
|               | H-1 $\rightarrow$ L+1  | 0.42279  |          |                             |                              | MLCT/LLCT      |                             |
|               | H $\rightarrow$ L      | 0.20132  |          |                             |                              | MLCT/LLCT/ILCT |                             |
| 2             | H-5 $\rightarrow$ L+1  | 0.11180  | 2.6662   | 0.0361                      | 465.02                       | MLCT/ILCT      | 488                         |
|               | H-4 $\rightarrow$ L    | 0.65662  |          |                             |                              | MLCT/ILCT      |                             |
|               | H-1 $\rightarrow$ L+1  | 0.15371  |          |                             |                              | MLCT/LLCT      |                             |
| 3             | H-10 $\rightarrow$ L   | 0.10027  | 3.2731   | 0.0179                      | 378.80                       | ILCT/LLCT/LMCT | 362                         |
|               | H-9 $\rightarrow$ L    | 0.52022  |          |                             |                              | ILCT           |                             |
|               | H-8 $\rightarrow$ L+1  | 0.39456  |          |                             |                              | ILCT/LMCT      |                             |
|               | H-2 $\rightarrow$ L+3  | 0.10472  |          |                             |                              | MLCT           |                             |
|               | H-1 $\rightarrow$ L+4  | 0.13492  |          |                             |                              | MLCT/LLCT      |                             |
| 4             | H-15 $\rightarrow$ L+3 | 0.10955  | 5.2387   | 0.1013                      | 236.67                       | LMCT/LLCT      | 233                         |
|               | H-10 $\rightarrow$ L+3 | 0.38167  |          |                             |                              | LMCT/LLCT      |                             |
|               | H-9 $\rightarrow$ L+2  | 0.10371  |          |                             |                              | LMCT/LLCT/ILCT |                             |
|               | H-8 $\rightarrow$ L+4  | 0.32627  |          |                             |                              | LMCT/LLCT      |                             |
|               | H-5 $\rightarrow$ L+7  | 0.16350  |          |                             |                              | MLCT/ILCT      |                             |
|               | H-4 $\rightarrow$ L+10 | 0.15908  |          |                             |                              | MLCT/ILCT      |                             |
|               | H-4 $\rightarrow$ L+11 | 0.17974  |          |                             |                              | MLCT/ILCT      |                             |



**Table S11** Compositions of the molecular orbitals of complex **4** associated with the electronic spectral transitions

| % Contribution<br>of fragments to | Fragments |                  |      |    |
|-----------------------------------|-----------|------------------|------|----|
|                                   | Ru        | PMe <sub>3</sub> | L-Cl | Cl |
| HOMO (H)                          | 66        | 4                | 14   | 16 |
| H-1                               | 71        | 0                | 9    | 20 |
| H-2                               | 77        | 1                | 14   | 8  |
| H-3                               | 65        | 3                | 30   | 2  |
| H-4                               | 46        | 3                | 48   | 3  |
| H-5                               | 48        | 3                | 40   | 9  |
| H-8                               | 2         | 0                | 89   | 9  |
| H-9                               | 9         | 1                | 86   | 4  |
| H-10                              | 0         | 0                | 56   | 44 |
| H-15                              | 4         | 1                | 42   | 53 |
| LUMO (L)                          | 15        | 0                | 82   | 3  |
| L+1                               | 17        | 0                | 82   | 1  |
| L+2                               | 55        | 3                | 31   | 11 |
| L+3                               | 51        | 20               | 20   | 9  |
| L+4                               | 47        | 26               | 14   | 13 |
| L+7                               | 3         | 0                | 96   | 1  |
| L+10                              | 3         | 1                | 96   | 0  |
| L+11                              | 4         | 2                | 93   | 1  |

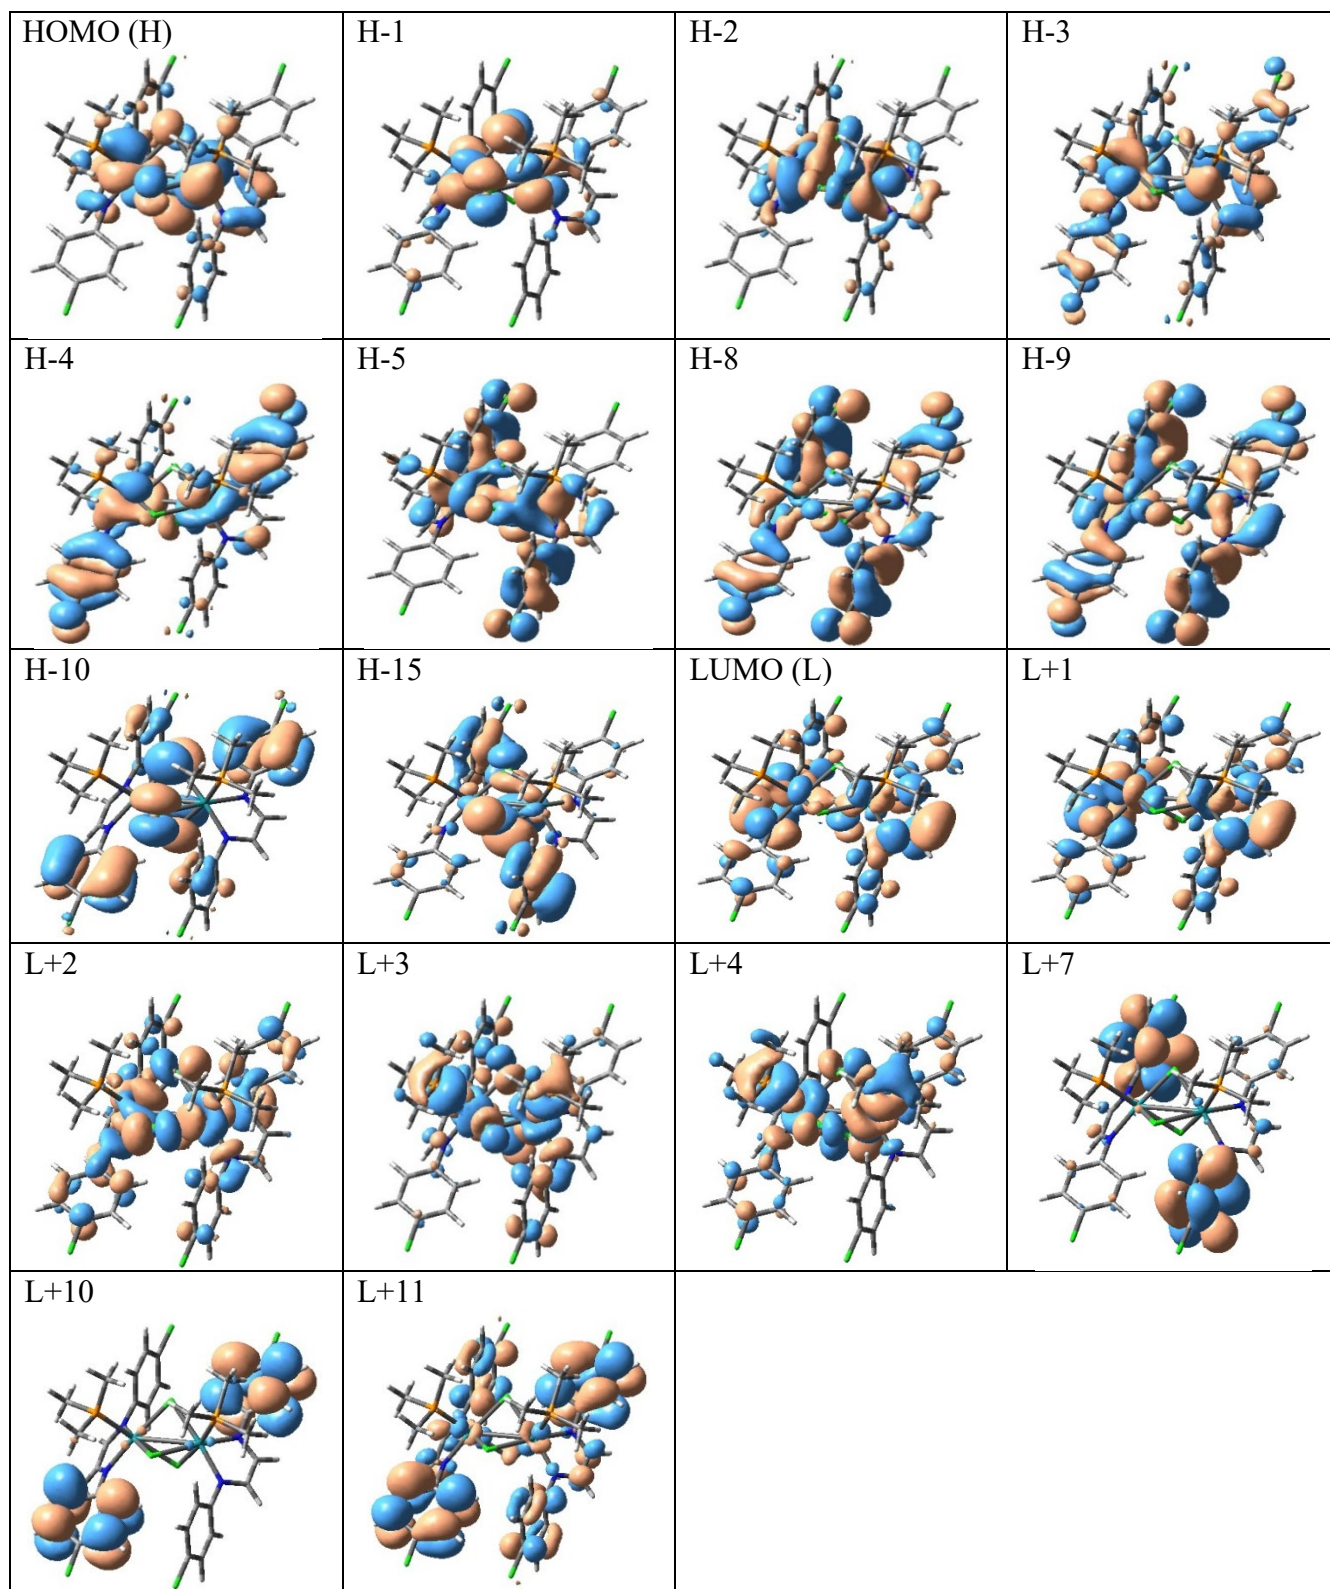

**Fig. S9** Contour plots of the molecular orbitals of complex 4, which are associated with the electronic spectral transitions (See **Table S10**).

**Table S12** Optimization of the reaction conditions for the oxidative coupling of benzylamine to imines<sup>a</sup>

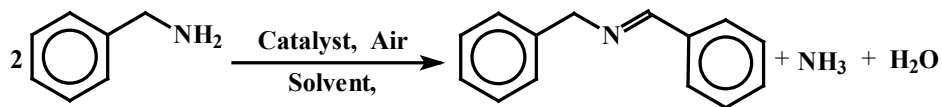

| Entry | Catalyst | Mole % of catalyst | Solvent            | Temp, °C        | Time, h | Yield <sup>b</sup> , % |
|-------|----------|--------------------|--------------------|-----------------|---------|------------------------|
| 1     | <b>1</b> | 1                  | Toluene            | 110             | 4       | >99                    |
| 2     | <b>1</b> | 0.5                | Toluene            | 110             | 4       | >99                    |
| 3     | <b>1</b> | 0.1                | Toluene            | 110             | 4       | >99                    |
| 4     | <b>1</b> | 0.01               | Toluene            | 110             | 4       | >99                    |
| 5     | <b>1</b> | 0.01               | Toluene            | 110             | 1       | >99                    |
| 6     | <b>1</b> | 0.001              | Toluene            | 110             | 1       | >99                    |
| 7     | <b>1</b> | 0.001              | Toluene            | 110             | 30 min  | 99                     |
| 8     | <b>1</b> | 0.001              | Toluene            | 110             | 10 min  | 78                     |
| 9     | <b>1</b> | 0.001              | Toluene-EtOH (8:2) | 110             | 30 min  | 67                     |
| 10    | <b>1</b> | 0.001              | EtOH               | 80              | 30 min  | 65                     |
| 11    | <b>1</b> | 0.0001             | Toluene            | 110             | 30 min  | 35                     |
| 12    | <b>1</b> | 0.001              | Toluene            | rt              | 30 min  | N.O.                   |
| 13    | <b>1</b> | 0.5                | Toluene            | rt <sup>c</sup> | 2       | 71                     |
| 14    | <b>1</b> | 0.5                | Toluene            | rt <sup>c</sup> | 4       | 99                     |
| 15    | <b>1</b> | 0.001              | Acetonitrile       | 85              | 30 min  | 78                     |
| 16    | <b>1</b> | 0.001              | Toluene            | 110             | 30 min  | 11 <sup>d</sup>        |
| 17    | <b>1</b> | 0.00               | Toluene            | 110             | 30 min  | N.O.                   |
| 18    | <b>2</b> | 0.001              | Toluene            | 110             | 30 min  | 98                     |
| 19    | <b>3</b> | 0.001              | Toluene            | 110             | 30 min  | 95                     |
| 20    | <b>4</b> | 0.001              | Toluene            | 110             | 30 min  | 96                     |

<sup>a</sup> Reaction conditions: Catalyst, [Ru<sub>2</sub>(PPh<sub>3</sub>)<sub>2</sub>(L-OCH<sub>3</sub>)<sub>2</sub>Cl<sub>3</sub>]Cl; substrate, benzylamine(0.5mmol); solvent (5.0 mL).

<sup>b</sup> Yield was determined by GCMS and the selectivity of imine was 100%.

<sup>c</sup> Room temperature stirring. <sup>d</sup> Reaction was performed under nitrogen atmosphere.

**Table S13** Crystallographic data for complexes **1**, **2** and **4**

| complex                                       | <b>1</b>                                                                                                                                                                              | <b>2</b>                                                                                                                                                              | <b>4</b>                                                                                                                                                                  |
|-----------------------------------------------|---------------------------------------------------------------------------------------------------------------------------------------------------------------------------------------|-----------------------------------------------------------------------------------------------------------------------------------------------------------------------|---------------------------------------------------------------------------------------------------------------------------------------------------------------------------|
| empirical formula                             | C <sub>68</sub> H <sub>62</sub> Cl <sub>3</sub> N <sub>4</sub> O <sub>4</sub> P <sub>2</sub> Ru <sub>2</sub> ,<br>C <sub>7</sub> H <sub>8</sub> , Cl <sup>-</sup> , 2H <sub>2</sub> O | C <sub>68</sub> H <sub>62</sub> Cl <sub>3</sub> N <sub>4</sub> P <sub>2</sub> Ru <sub>2</sub> ,<br>C <sub>7</sub> H <sub>8</sub> , Cl <sup>-</sup> , H <sub>2</sub> O | C <sub>64</sub> H <sub>50</sub> Cl <sub>7</sub> N <sub>4</sub> P <sub>2</sub> Ru <sub>2</sub> ,<br>C <sub>7</sub> H <sub>8</sub> , Cl <sup>-</sup> , 0.7 H <sub>2</sub> O |
| formula weight                                | 1532.00                                                                                                                                                                               | 1450.19                                                                                                                                                               | 1526.60                                                                                                                                                                   |
| crystal system                                | Monoclinic                                                                                                                                                                            | Monoclinic                                                                                                                                                            | Monoclinic                                                                                                                                                                |
| space group                                   | C2/c                                                                                                                                                                                  | C2/c                                                                                                                                                                  | C2/c                                                                                                                                                                      |
| <i>a</i> (Å)                                  | 33.324(3)                                                                                                                                                                             | 32.5574(15)                                                                                                                                                           | 32.926(5)                                                                                                                                                                 |
| <i>b</i> (Å)                                  | 17.1944(14)                                                                                                                                                                           | 17.2458(6)                                                                                                                                                            | 17.173(2)                                                                                                                                                                 |
| <i>c</i> (Å)                                  | 26.901(3)                                                                                                                                                                             | 26.4277(10)                                                                                                                                                           | 26.459(3)                                                                                                                                                                 |
| $\alpha$ (°)                                  | 90                                                                                                                                                                                    | 90                                                                                                                                                                    | 90                                                                                                                                                                        |
| $\beta$ (°)                                   | 115.272(3)                                                                                                                                                                            | 112.892(3)                                                                                                                                                            | 113.647(4)                                                                                                                                                                |
| $\gamma$ (°)                                  | 90                                                                                                                                                                                    | 90                                                                                                                                                                    | 90                                                                                                                                                                        |
| <i>V</i> (Å <sup>3</sup> )                    | 13939(2)                                                                                                                                                                              | 13669.9(10)                                                                                                                                                           | 13705(3)                                                                                                                                                                  |
| <i>Z</i>                                      | 8                                                                                                                                                                                     | 8                                                                                                                                                                     | 8                                                                                                                                                                         |
| <i>D</i> <sub>calcd</sub> /mg m <sup>-3</sup> | 1.428                                                                                                                                                                                 | 1.409                                                                                                                                                                 | 1.480                                                                                                                                                                     |
| <i>F</i> (000)                                | 6140                                                                                                                                                                                  | 5548                                                                                                                                                                  | 5584                                                                                                                                                                      |
| crystal size (mm)                             | 0.20 × 0.18 × 0.12                                                                                                                                                                    | 0.12 × 0.11 × 0.08                                                                                                                                                    | 0.15 × 0.12 × 0.10                                                                                                                                                        |
| <i>T</i> (K)                                  | 273                                                                                                                                                                                   | 296                                                                                                                                                                   | 273                                                                                                                                                                       |
| $\mu$ (mm <sup>-1</sup> )                     | 0.688                                                                                                                                                                                 | 0.687                                                                                                                                                                 | 0.845                                                                                                                                                                     |
| R1 <sup>a</sup>                               | 0.0657                                                                                                                                                                                | 0.0397                                                                                                                                                                | 0.1066                                                                                                                                                                    |
| wR2 <sup>b</sup>                              | 0.1637                                                                                                                                                                                | 0.1103                                                                                                                                                                | 0.3686                                                                                                                                                                    |
| GOF <sup>c</sup>                              | 1.089                                                                                                                                                                                 | 1.109                                                                                                                                                                 | 1.110                                                                                                                                                                     |

$$^a R1 = \frac{\sum ||F_o| - |F_c||}{\sum |F_o|}$$

$$^b wR2 = [\frac{\sum \{w(F_o^2 - F_c^2)^2\}}{\sum \{w(F_o^2)\}}]^{1/2}$$

$$^c GOF = [\frac{\sum (w(F_o^2 - F_c^2)^2)}{(M-N)}]^{1/2}, \text{ where } M \text{ is the number of reflections and } N \text{ is the number of parameters refined.}$$
